# Supplementary material for: A Preliminary Assessment of the Nutraceutical Potential of Acai Berry (Euterpe sp.) as a Potential Natural Treatment for Alzheimer’s Disease
Source: MDPI journal article supplement (doi:10.3390/molecules27154891), 2022-07-30
Supplement: s1 [file s1]

Supplementary Table S1: Chemical compounds detected in acai berry extracts with possible cholinesterase inhibitor activity and recognized antioxidant activity. [99–172].

| Compounds in Acai Extract                                                                      | Cholinesterase Inhibitor Activity |       | Antioxidant Activity                             |
|------------------------------------------------------------------------------------------------|-----------------------------------|-------|--------------------------------------------------|
|                                                                                                | AChE                              | BuChE |                                                  |
| <b>Phenolic compounds and phenolic acids:</b>                                                  |                                   |       |                                                  |
| Ferulic acid                                                                                   | √                                 | √     | + (DPPH, ABTS <sup>•+</sup> )                    |
| Protocatechuic acid                                                                            | √                                 | √     | + (DPPH, ABTS <sup>•+</sup> , FRAP)              |
| Syringic acid                                                                                  | √                                 | √     | + (DPPH, ABTS <sup>•+</sup> )                    |
| Vanillic acid                                                                                  | √                                 | √     | + (DPPH, ABTS <sup>•+</sup> , FRAP)              |
| Gallic acid                                                                                    | √                                 | √     | + (DPPH, ABTS <sup>•+</sup> , FRAP)              |
| 4-Hydroxybenzoic acid                                                                          | √                                 | √     | + (DPPH, ABTS <sup>•+</sup> )                    |
| Benzoic acid                                                                                   | √                                 | √     | + (DPPH)                                         |
| Coumaric acid                                                                                  | √                                 | √     | + (DPPH, ABTS <sup>•+</sup> )                    |
| 3,4'-dihydroxy-3'-methoxypropiofenone                                                          | -                                 | -     | -                                                |
| Protocatechuic acidmethyl ester                                                                | -                                 | -     | + (DPPH)                                         |
| 3,4-Dihydroxybenzoic acid                                                                      | -                                 | -     | + (DPPH, ABTS <sup>•+</sup> , FRAP)              |
| 2,5-Dihydroxybenzoic acid                                                                      | -                                 | -     | + (DPPH, ABTS <sup>•+</sup> , FRAP)              |
| Chlorogenic acid                                                                               | √                                 | √     | + (DPPH, ABTS <sup>•+</sup> , FRAP)              |
| Caffeic acid                                                                                   | √                                 | √     | + (DPPH, ABTS <sup>•+</sup> , O <sup>2•-</sup> ) |
| Trans-cinnamic acid                                                                            | √                                 | -     | + (DPPH, ABTS <sup>•+</sup> )                    |
| Ellagic acid                                                                                   | √                                 | √     | + (DPPH, ABTS <sup>•+</sup> , FRAP)              |
| 3-hydroxy-1-(4-hydroxy-3,5-dimethoxyphenyl)-1-Propanone                                        | -                                 | -     | -                                                |
| <b>Lignans:</b>                                                                                |                                   |       |                                                  |
| (+)-isolariciresinol                                                                           | -                                 | √     | + (DPPH)                                         |
| (+)-5-methoxy-isolariciresinol                                                                 | -                                 | -     | + (DPPH)                                         |
| Erythro-1-(4-hydroxy-3-methoxyphenyl)-2-[4-(3-Hydroxypropyl)-2-methoxyphenoxy]-1,3-propanediol | -                                 | -     | + (SOD)                                          |
| Threo-1-(4-hydroxy-3-methoxyphenyl)-2-[4-(3-hydroxypropyl)-2-methoxyphenoxy]-1,3-propanediol   | -                                 | -     | + (SOD)                                          |
| (-)-(7R,8S)-dihydrodehydroconiferyl alcohol                                                    | -                                 | -     | -                                                |
| (+)-(7R,8S)-5-methoxy-dihydrodehydroconiferyl alcohol                                          | -                                 | -     | -                                                |
| (+)-lariciresinol                                                                              | √                                 | √     | + (DPPH, ABTS <sup>•+</sup> , •OH, FRAP, SOD)    |
| (+)-pinoresinol                                                                                | √                                 | -     | + (DPPH)                                         |
| (+)-syringaresinol                                                                             | √                                 | -     | + (DPPH)                                         |
| 3-hydroxy-1-(4-hydroxy-3,5-dimethoxyphenyl)-1-propanone                                        | -                                 | -     | + (DPPH)                                         |
| 3,4'-dihydroxy-3'-methoxypropiofenone                                                          | -                                 | -     | -                                                |
| Dihydroconiferyl alcohol                                                                       | -                                 | -     | -                                                |
| Protocatechuicacid methyl ester                                                                | -                                 | -     | + (DPPH, ABTS <sup>•+</sup> )                    |
| <b>Amino Acids:</b>                                                                            |                                   |       |                                                  |
| Alanine                                                                                        | √                                 | -     | -                                                |
| Lysine                                                                                         | √                                 | -     | +                                                |
| Arginine                                                                                       | √                                 | -     | +                                                |
| Methionine                                                                                     | ND                                | -     | +                                                |
| Aspartic acid                                                                                  | √                                 | -     | -                                                |
| Phenylalanine                                                                                  | ND                                | -     | -                                                |

|                                           |    |   |                                               |
|-------------------------------------------|----|---|-----------------------------------------------|
| Cysteine                                  | √  | - | +                                             |
| Proline                                   | √  | - | -                                             |
| Glutamic acid                             | ND | - | -                                             |
| Serine                                    | √  | - | -                                             |
| Glycine                                   | -  | - | -                                             |
| Threonine                                 | -  | - | -                                             |
| Histidine                                 | ND | - | +                                             |
| Tryptophan                                | ND | - | +                                             |
| Hydroxyproline                            | -  | - | +                                             |
| Tyrosine                                  | √  | - | +                                             |
| Isoleucine                                | -  | - | -                                             |
| Valine                                    | √  | - | -                                             |
| Leucine                                   | ND | - | -                                             |
| <b>Anthocyanins:</b>                      |    |   |                                               |
| Cyanidin 3-arabinoside                    | -  | - | + (ROS)                                       |
| Cyanidin 3-arabionosylarabionoside        | -  | - | -                                             |
| Cyanidin-3-O-glucoside                    | ND | - | + (DPPH, ORAC)                                |
| Cyanidin-3-O-rutinoside                   | -  | - | + (H <sub>2</sub> O <sub>2</sub> , FRAP, •NO) |
| Pelargonidin-3-O-glucoside                | -  | - | + (LPO, O <sup>2•-</sup> )                    |
| Peonidin-3-O-rutinoside                   | -  | - | -                                             |
| Cyanidin 3-sambubioside                   | -  | - | -                                             |
| Delphinidin 3-glucoside                   | -  | - | + (LPO)                                       |
| Malvidin 3-glucoside (Oenin chloride)     | -  | - | + (DPPH, ORAC)                                |
| Peonidin 3-glucoside                      | -  | - | -                                             |
| <b>Proanthocyanidins:</b>                 |    |   |                                               |
| Catechin (+)                              | √  | √ | + (DPPH, ABTS <sup>•+</sup> , FRAP)           |
| Epicatechin (-)                           | √  | √ | + (DPPH, ABTS <sup>•+</sup> )                 |
| Epigallocatechin                          | √  | √ | + (DPPH, ABTS <sup>•+</sup> )                 |
| <b>Carotenoids:</b>                       |    |   |                                               |
| α-carotene                                | -  | - | + (αTEAC, LPSC)                               |
| β-carotene                                | -  | - | + (DPPH, ABTS <sup>•+</sup> )                 |
| Lutein                                    | √  | - | + (DPPH, ABTS <sup>•+</sup> , FRAP)           |
| Zeaxanthin                                | -  | - | +                                             |
| <b>Flavonoids:</b>                        |    |   |                                               |
| Apigenin                                  | √  | √ | + (DPPH, ABTS <sup>•+</sup> , ORAC)           |
| Dihydrokaempferol                         | -  | - | + (DPPH, ABTS <sup>•+</sup> , FRAP)           |
| Isovitexin                                | √  | √ | + (DPPH, ORAC)                                |
| Luteolin                                  | √  | √ | + (DPPH, ABTS <sup>•+</sup> , FRAP, ORAC)     |
| luteolin-C-8 -glucoside (orientin)        | -  | - | + (DPPH, ABTS <sup>•+</sup> , FRAP)           |
| luteolin-6-C-glucoside (homo-orientin)    | -  | - | + (DPPH, ABTS <sup>•+</sup> , FRAP)           |
| Quercetin                                 | √  | √ | + (DPPH, ABTS <sup>•+</sup> )                 |
| Scoparin                                  | -  | - | -                                             |
| Taxifolin deoxyhexose or Taxifolin        | -  | - | + (DPPH, ABTS <sup>•+</sup> )                 |
| Velutin                                   | -  | - | + (ORAC)                                      |
| Quercetin-3-O-rutinoside (rutin)          | √  | √ | + (DPPH, ABTS <sup>•+</sup> )                 |
| Vitexin                                   | √  | √ | + (DPPH, ORAC)                                |
| Kaempferol rutinoside                     | √  | √ | + (DPPH, ABTS <sup>•+</sup> , ROS)            |
| Kaempferol rhamnoside                     | -  | - | + (DPPH, ABTS <sup>•+</sup> , ROS)            |
| Isoorientin                               | √  | √ | + (DPPH, ORAC)                                |
| Crisoeirol                                | -  | - | -                                             |
| 5,4'-dihydroxy-7, 3',5'-trimethoxyflavone | -  | - | + (ORAC)                                      |
| Luteolin diglycoside                      | -  | - | -                                             |
| Procyanidin dimers                        | -  | - | + (DPPH, ABTS <sup>•+</sup> )                 |

|                                                                      |   |   |                                                                    |
|----------------------------------------------------------------------|---|---|--------------------------------------------------------------------|
| Chrysoeriol                                                          | - | - | + (LPO, O <sup>2•-</sup> )                                         |
| <b>Benzoquinone:</b>                                                 |   |   |                                                                    |
| 2,6-dimethoxy-1, 4-benzoquinone                                      | √ | √ | + (O <sup>2•-</sup> )                                              |
| Monoterpenoids:                                                      |   |   |                                                                    |
| (+)-menthiafolic acid                                                | - | - | -                                                                  |
| (E,Z)-2,6-dimethyl-2,6-octadiene-1,8-diol                            | - | - | -                                                                  |
| (E,E)-2,6-dimethyl-2,6-octadiene-1,8-diol                            | - | - | -                                                                  |
| <b>Norisoprenoids:</b>                                               |   |   |                                                                    |
| (-)-loliolide                                                        | √ | √ | + (DPPH, ONOO <sup>-</sup> )                                       |
| (4R)-4-[(1E)-3-hydroxy-1-butenyl]-3,5,5-trimethyl-2-cyclohexen-1-one | - | - | -                                                                  |
| Lipids sterols:                                                      |   |   |                                                                    |
| β-sitosterol                                                         | √ | √ | + (DPPH, ABTS <sup>•+</sup> , H <sub>2</sub> O <sub>2</sub> , LPO) |
| Campesterol                                                          | - | - | + (LPO)                                                            |
| Sitgmasterol                                                         | √ | - | + (LPO)                                                            |
| <b>Major Fatty Acids:</b>                                            |   |   |                                                                    |
| Monounsaturated Fatty Acids                                          |   |   |                                                                    |
| Oleic acid                                                           | - | - | + (ROS)                                                            |
| Palmitoleic acid                                                     | - | - | -                                                                  |
| Polyunsaturated Fatty Acids                                          |   |   |                                                                    |
| Linoleic acid                                                        | √ | - | + (DPPH, ONOO <sup>-</sup> )                                       |
| Linolenic acid                                                       | √ | √ | + (DPPH, ONOO <sup>-</sup> )                                       |
| Saturated Fatty Acids                                                |   |   |                                                                    |
| Palmitic acid                                                        | √ | √ | -                                                                  |
| Stearic acid                                                         | - | - | -                                                                  |
| <b>Stilbenes:</b>                                                    |   |   |                                                                    |
| Trans-resveratrol                                                    | √ | √ | + (DPPH, ABTS <sup>•+</sup> , ORAC)                                |
| <b>Vitamins and minerals:</b>                                        |   |   |                                                                    |
| Calcium                                                              | √ | - | -                                                                  |
| Copper                                                               | √ | - | -                                                                  |
| Iron                                                                 | √ | - | -                                                                  |
| Vitamin A                                                            | - | - | + (DPPH, FRAP)                                                     |
| Vitamin C                                                            | - | - | + (DPPH, ABTS <sup>•+</sup> , O <sup>2•-</sup> )                   |

Abbreviation: αTEAC, α-tocopherol equivalent antioxidant capacity; ABTS, 2,2'-azino-bis(3-ethylbenzothiazoline-6-sulfonic); DPPH, 2,2-diphenyl-1-picrylhydrazyl; FRAP, ferric reducing antioxidant power; H<sub>2</sub>O<sub>2</sub>, hydrogen peroxide; •OH, hydroxyl radical scavenging assay; LPO, lipid peroxidation; LPSC, luminol-chemiluminescence peroxy radical scavenging capacity; ND, not detected; •NO, nitric oxide; O<sup>2•-</sup>, superoxide anion radical; ONOO<sup>-</sup>, peroxyxynitrite; ORAC, oxygen radical absorption capacity; ROS, reactive oxygen species; SOD, superoxide radical scavenging assay; (-), no data.
